# Supplementary material for: The non-adiabatic exciton transfer in tetrathiafulvalene chains: a theoretical study of signal transmission in a molecular logic system
Source: Royal Society of Chemistry journal article supplement (doi:10.1039/d0cp03065a), 2020-01-01
Supplement: d0cp03065a1.pdf [file d0cp03065a1.pdf]

**Supplementary Information for**

The non-adiabatic exciton transfer in tetrathiafulvalene chains: a theoretical study of signal transmission in a molecular logic system

Arthur I. Martynov,<sup>\*1</sup> Aleksandr S. Belov<sup>2</sup>, Vladimir K. Nevolin<sup>1</sup>

<sup>1</sup>National Research University of Electronic Technology, 1 Shokin Square, Zelenograd, Moscow, Russia. E-mail: i.martynov2@rambler.ru

<sup>2</sup>Department of Chemistry, Lomonosov Moscow State University, 1-3 Leninskie gory, Moscow, Russia

Table 1. Parameters of TTF<sub>2</sub>CN and TTF<sub>2</sub>F are required for evaluating the rate of S<sub>2</sub>→S<sub>1</sub> transfer.

| TTF <sub>2</sub> CN                                        |                             |            | TTF <sub>2</sub> F                                         |                             |            |
|------------------------------------------------------------|-----------------------------|------------|------------------------------------------------------------|-----------------------------|------------|
| Vibration frequency of mode $\omega_j$ (cm <sup>-1</sup> ) | Huang-Rhys factor ( $y_j$ ) | $\Delta Q$ | Vibration frequency of mode $\omega_j$ (cm <sup>-1</sup> ) | Huang-Rhys factor ( $y_j$ ) | $\Delta Q$ |
| 3283.2                                                     | 0.0000                      | 0.06       | 3291.3                                                     | 0.0000                      | 0.03       |
| 3276.9                                                     | 0.0005                      | -0.26      | 3282.9                                                     | 0.0000                      | -0.03      |
| 3267.2                                                     | 0.0000                      | -0.05      | 3266.5                                                     | 0.0000                      | -0.04      |
| 3264.1                                                     | 0.0000                      | -0.03      | 3264.5                                                     | 0.0000                      | 0.08       |
| 3263.7                                                     | 0.0002                      | -0.15      | 3263.7                                                     | 0.0000                      | 0.00       |
| 2408.1                                                     | 0.0012                      | -0.47      | 1756.3                                                     | 0.0201                      | 2.24       |
| 1710.4                                                     | 0.0035                      | 0.95       | 1708.9                                                     | 0.0172                      | 2.10       |
| 1693.8                                                     | 0.8462                      | 14.81      | 1690.1                                                     | 0.1414                      | 6.06       |
| 1680.3                                                     | 0.0807                      | 4.59       | 1671.5                                                     | 0.0636                      | -4.09      |
| 1660.9                                                     | 0.0739                      | 4.42       | 1657.6                                                     | 0.0066                      | 1.32       |
| 1653.5                                                     | 0.0010                      | -0.51      | 1642.3                                                     | 0.0071                      | 1.38       |
| 1641.5                                                     | 0.0359                      | -3.10      | 1315.8                                                     | 0.0000                      | 0.04       |
| 1315.5                                                     | 0.0000                      | -0.11      | 1309.2                                                     | 0.0003                      | -0.34      |
| 1309.3                                                     | 0.0057                      | -1.38      | 1271.5                                                     | 0.0002                      | 0.23       |
| 1271.1                                                     | 0.0023                      | 0.89       | 1265.6                                                     | 0.0023                      | 0.89       |
| 1266.0                                                     | 0.0115                      | 2.00       | 1236.6                                                     | 0.0008                      | 0.53       |
| 1236.7                                                     | 0.0238                      | 2.90       | 1210.5                                                     | 0.0065                      | 1.54       |
| 1145.3                                                     | 0.2911                      | -10.56     | 1143.9                                                     | 0.0022                      | 0.92       |
| 1143.7                                                     | 0.0067                      | 1.61       | 1042.8                                                     | 0.0051                      | -1.46      |
| 1042.4                                                     | 0.0004                      | 0.43       | 1039.8                                                     | 0.0010                      | 0.64       |
| 1039.6                                                     | 0.0013                      | 0.73       | 906.1                                                      | 0.0000                      | 0.00       |
| 906.2                                                      | 0.0000                      | 0.00       | 898.5                                                      | 0.0460                      | -4.74      |
| 897.2                                                      | 0.0091                      | 2.11       | 894.7                                                      | 0.0238                      | -3.42      |
| 893.5                                                      | 0.0011                      | 0.75       | 887.3                                                      | 0.0017                      | -0.92      |
| 886.9                                                      | 0.0106                      | -2.29      | 878.7                                                      | 0.0027                      | 1.16       |
| 877.8                                                      | 0.0032                      | -1.27      | 869.4                                                      | 0.0008                      | 0.64       |
| 868.0                                                      | 0.0775                      | 6.26       | 830.3                                                      | 0.0000                      | -0.06      |
| 840.5                                                      | 0.0000                      | 0.00       | 814.4                                                      | 0.0000                      | 0.00       |
| 830.2                                                      | 0.0000                      | 0.10       | 800.8                                                      | 0.0011                      | 0.78       |
| 814.7                                                      | 0.0000                      | 0.00       | 798.5                                                      | 0.0007                      | -0.63      |
| 800.8                                                      | 0.0109                      | 2.45       | 784.5                                                      | 0.0000                      | 0.00       |
| 799.4                                                      | 0.0474                      | 5.10       | 771.4                                                      | 0.0000                      | 0.00       |
| 784.9                                                      | 0.0000                      | 0.00       | 770.1                                                      | 0.2574                      | -12.11     |
| 770.1                                                      | 0.7904                      | 21.23      |                                                            |                             |            |

---

|       |        |        |       |        |       |
|-------|--------|--------|-------|--------|-------|
| 763.1 | 0.0630 | 6.02   | 763.2 | 0.0199 | -3.38 |
| 701.6 | 0.3121 | 13.97  | 705.4 | 0.0456 | 5.33  |
| 696.4 | 0.5953 | -19.37 | 700.8 | 0.0050 | -1.77 |
| 669.7 | 0.0000 | 0.00   | 669.9 | 0.0000 | 0.00  |
| 637.7 | 0.0168 | -3.40  | 637.6 | 0.0037 | -1.60 |
| 626.4 | 0.0472 | -5.75  | 626.3 | 0.0086 | -2.45 |
| 567.7 | 0.0000 | 0.00   | 549.9 | 0.0000 | 0.00  |
| 549.5 | 0.0000 | 0.00   | 538.9 | 0.0000 | 0.00  |
| 538.9 | 0.0000 | 0.00   | 536.8 | 0.0000 | 0.00  |
| 536.2 | 0.0000 | 0.00   |       |        |       |
| 524.9 | 0.1683 | -11.86 | 522.4 | 0.0126 | -3.26 |
| 492.8 | 0.0056 | -2.23  | 494.0 | 0.0029 | 1.60  |
| 491.5 | 0.0832 | 8.62   | 492.7 | 0.0016 | -1.20 |
| 480.3 | 0.2985 | 16.52  | 468.2 | 0.0000 | 0.00  |
| 454.3 | 0.0283 | 5.23   | 454.7 | 0.0069 | 2.57  |
| 442.2 | 0.0000 | 0.00   | 449.9 | 0.0009 | 0.93  |
| 438.5 | 0.0720 | 8.49   | 442.3 | 0.0000 | 0.00  |
| 427.0 | 0.0000 | 0.00   | 427.1 | 0.0000 | 0.00  |
| 397.0 | 0.0000 | 0.00   | 385.1 | 0.0156 | 4.21  |
| 373.5 | 0.1170 | -11.73 | 363.0 | 0.0019 | -1.52 |
| 331.6 | 0.0225 | 5.46   | 332.0 | 0.0003 | -0.60 |
| 326.3 | 0.0674 | 9.52   | 315.4 | 0.0174 | -4.92 |
| 289.7 | 0.0183 | -5.27  | 281.6 | 0.0004 | 0.79  |
| 258.1 | 0.0000 | 0.00   | 258.1 | 0.0000 | 0.00  |
| 250.7 | 3.0090 | -72.59 | 251.2 | 0.8836 | 39.30 |
| 247.4 | 0.0000 | 0.00   | 247.6 | 0.0000 | 0.00  |
| 241.8 | 0.0000 | 0.00   | 246.0 | 0.0000 | 0.00  |
| 169.2 | 0.0598 | 12.46  | 239.6 | 0.0000 | 0.00  |
| 153.1 | 0.0000 | 0.00   | 145.9 | 0.0093 | -5.29 |
| 144.7 | 0.0182 | -7.44  | 135.7 | 0.0377 | 11.05 |
| 116.3 | 0.2269 | 29.26  | 107.2 | 0.0000 | 0.00  |
| 107.4 | 0.0000 | 0.00   | 86.7  | 0.0000 | 0.00  |
| 85.8  | 0.0000 | 0.00   | 79.9  | 0.0540 | 17.22 |
| 74.3  | 0.0000 | 0.29   | 71.9  | 0.0000 | 0.00  |
| 70.1  | 0.0000 | 0.00   | 57.4  | 0.0000 | 0.00  |
| 57.4  | 0.0000 | 0.00   | 39.7  | 0.0000 | 0.55  |
| 35.9  | 0.1903 | 48.21  | 38.9  | 0.0000 | 0.00  |
| 35.9  | 0.0000 | 0.00   |       |        |       |

---

Table 2. Non-adiabatic matrix elements (NACME) of TTF<sub>2</sub>CN optimized at S<sub>2</sub>-state

| ATOM | D/DX       | D/DY       | D/DZ      |
|------|------------|------------|-----------|
| H    | -0.0000482 | 0.0001060  | 0.0000000 |
| C    | 0.0005460  | 0.0003236  | 0.0000000 |
| C    | -0.0002571 | 0.0005406  | 0.0000000 |
| H    | -0.0002503 | -0.0000940 | 0.0000000 |
| S    | -0.0008720 | -0.0026407 | 0.0000000 |
| C    | 0.0066516  | 0.0007314  | 0.0000000 |
| S    | -0.0030373 | -0.0018780 | 0.0000000 |
| C    | -0.0037041 | 0.0091925  | 0.0000000 |
| S    | -0.0083810 | -0.0010729 | 0.0000000 |
| S    | 0.0072023  | -0.0018737 | 0.0000000 |
| C    | -0.0090075 | 0.0012745  | 0.0000000 |
| H    | 0.0018164  | -0.0006127 | 0.0000000 |
| C    | 0.0104612  | 0.0069042  | 0.0000000 |
| C    | -0.0116452 | -0.0065613 | 0.0000000 |
| C    | 0.0076524  | -0.0031057 | 0.0000000 |
| S    | 0.0124518  | 0.0029841  | 0.0000000 |
| H    | -0.0016599 | 0.0005241  | 0.0000000 |
| S    | -0.0036147 | 0.0051922  | 0.0000000 |
| C    | -0.0058532 | -0.0121247 | 0.0000000 |
| C    | -0.0003400 | -0.0106863 | 0.0000000 |
| S    | 0.0031307  | 0.0082404  | 0.0000000 |
| S    | -0.0011064 | 0.0083247  | 0.0000000 |
| C    | -0.0020849 | -0.0025673 | 0.0000000 |
| C    | 0.0018410  | -0.0011613 | 0.0000000 |
| H    | -0.0000017 | -0.0001506 | 0.0000000 |
| C    | 0.0002697  | 0.0003318  | 0.0000000 |
| N    | -0.0002512 | -0.0001923 | 0.0000000 |

Table 3. Non-adiabatic matrix elements (NACME) of TTF<sub>2</sub>F optimized at S<sub>2</sub>-state

| ATOM | D/DX       | D/DY       | D/DZ      |
|------|------------|------------|-----------|
| H    | -0.0042662 | 0.0086480  | 0.0000000 |
| C    | 0.0065450  | 0.0150792  | 0.0000000 |
| C    | 0.0021913  | 0.0106624  | 0.0000000 |
| H    | -0.0086672 | -0.0032553 | 0.0000000 |
| S    | -0.0575443 | -0.0552413 | 0.0000000 |
| C    | 0.1717821  | -0.0080935 | 0.0000000 |
| S    | -0.0342042 | 0.0066427  | 0.0000000 |
| C    | -0.1216084 | 0.0304310  | 0.0000000 |
| S    | 0.0124307  | -0.0045626 | 0.0000000 |
| S    | 0.0459140  | 0.0001636  | 0.0000000 |
| C    | -0.0491825 | -0.0204819 | 0.0000000 |
| H    | 0.0049204  | 0.0006581  | 0.0000000 |
| C    | 0.0351556  | 0.0524981  | 0.0000000 |
| C    | -0.0423362 | -0.0172150 | 0.0000000 |
| C    | 0.0164430  | -0.0153402 | 0.0000000 |
| S    | 0.0681906  | 0.0064810  | 0.0000000 |
| H    | 0.0011259  | 0.0036897  | 0.0000000 |
| S    | 0.0215101  | -0.0077360 | 0.0000000 |
| C    | -0.1645730 | 0.0123668  | 0.0000000 |
| C    | 0.1520673  | -0.1036082 | 0.0000000 |
| S    | -0.0022129 | 0.0712673  | 0.0000000 |
| S    | -0.0452881 | 0.0332962  | 0.0000000 |
| C    | -0.0092898 | -0.0136097 | 0.0000000 |
| C    | 0.0170003  | -0.0006293 | 0.0000000 |
| H    | -0.0065852 | -0.0056398 | 0.0000000 |
| F    | -0.0095225 | 0.0034940  | 0.0000000 |

Table 4. Coordinates of TTF<sub>2</sub>CN optimized at S<sub>0</sub>

| ATOM | X             | Y             | Z            |
|------|---------------|---------------|--------------|
| H    | -8.7542582642 | -0.3513168130 | 0.0000000000 |
| C    | -7.7384614449 | 0.0232370044  | 0.0000000000 |
| C    | -7.4062761109 | 1.3108417205  | 0.0000000000 |
| H    | -8.1138464976 | 2.1302689336  | 0.0000000000 |
| S    | -5.7001796422 | 1.7225532991  | 0.0000000000 |
| C    | -5.1370554296 | 0.0381946330  | 0.0000000000 |
| S    | -6.4456769689 | -1.1633224710 | 0.0000000000 |
| C    | -3.8385024425 | -0.2965109253 | 0.0000000000 |
| S    | -2.5352917408 | 0.9071249029  | 0.0000000000 |
| S    | -3.2718610046 | -1.9789947822 | 0.0000000000 |
| C    | -1.5776489173 | -1.5676541315 | 0.0000000000 |
| H    | -0.8804491684 | -2.3967857412 | 0.0000000000 |
| C    | -1.2150573458 | -0.2780955926 | 0.0000000000 |
| C    | 0.1535375937  | 0.2211084702  | 0.0000000000 |
| C    | 0.5190106676  | 1.5094434776  | 0.0000000000 |
| S    | 1.4748043221  | -0.9641585161 | 0.0000000000 |
| H    | -0.1758728668 | 2.3402394433  | 0.0000000000 |
| S    | 2.2159841189  | 1.9168290124  | 0.0000000000 |
| C    | 2.7779006011  | 0.2357920910  | 0.0000000000 |
| C    | 4.0763453166  | -0.0985432078 | 0.0000000000 |
| S    | 5.3837911629  | 1.1062140517  | 0.0000000000 |
| S    | 4.6336297496  | -1.7884533599 | 0.0000000000 |
| C    | 6.6773181153  | -0.1013356482 | 0.0000000000 |
| C    | 6.3246982779  | -1.3941142459 | 0.0000000000 |
| H    | 7.0357051630  | -2.2108264448 | 0.0000000000 |
| C    | 8.0275059622  | 0.3470362939  | 0.0000000000 |
| N    | 9.1228015512  | 0.7204344046  | 0.0000000000 |

Table 5. Coordinates of TTF<sub>2</sub>CN optimized at S<sub>1</sub>

| ATOM | X             | Y             | Z            |
|------|---------------|---------------|--------------|
| H    | -8.7359548399 | -0.3634942081 | 0.0000000000 |
| C    | -7.7213893265 | 0.0143671128  | 0.0000000000 |
| C    | -7.3930612552 | 1.3029343843  | 0.0000000000 |
| H    | -8.1029712147 | 2.1203270211  | 0.0000000000 |
| S    | -5.6881432302 | 1.7195203224  | 0.0000000000 |
| C    | -5.1200077809 | 0.0371467934  | 0.0000000000 |
| S    | -6.4248906499 | -1.1681764899 | 0.0000000000 |
| C    | -3.8202468978 | -0.2925846005 | 0.0000000000 |
| S    | -2.5194682128 | 0.9139582774  | 0.0000000000 |
| S    | -3.2475673559 | -1.9737727830 | 0.0000000000 |
| C    | -1.5569962373 | -1.5596974047 | 0.0000000000 |
| H    | -0.8560313476 | -2.3858202856 | 0.0000000000 |
| C    | -1.1962826304 | -0.2691724835 | 0.0000000000 |
| C    | 0.1688558660  | 0.2376341107  | 0.0000000000 |
| C    | 0.5349162111  | 1.5251364078  | 0.0000000000 |
| S    | 1.5076264474  | -0.9615795156 | 0.0000000000 |
| H    | -0.1439289092 | 2.3684104334  | 0.0000000000 |
| S    | 2.2545287517  | 1.9299053153  | 0.0000000000 |
| C    | 2.7508111524  | 0.2675682221  | 0.0000000000 |
| C    | 4.0902360547  | -0.0795094146 | 0.0000000000 |
| S    | 5.3089898096  | 1.1440321579  | 0.0000000000 |
| S    | 4.5301500756  | -1.7879658125 | 0.0000000000 |
| C    | 6.6665446400  | -0.1499410442 | 0.0000000000 |
| C    | 6.2790281957  | -1.4196944447 | 0.0000000000 |
| H    | 6.9327236627  | -2.2822957097 | 0.0000000000 |
| C    | 7.9985016842  | 0.3170467961  | 0.0000000000 |
| N    | 9.0757338804  | 0.7453777728  | 0.0000000000 |

Table 6. Coordinates of TTF<sub>2</sub>CN optimized at S<sub>2</sub>

| ATOM | X             | Y             | Z            |
|------|---------------|---------------|--------------|
| H    | -8.7132572237 | -0.3250348743 | 0.0000000000 |
| C    | -7.7010423389 | 0.0577137288  | 0.0000000000 |
| C    | -7.3517714082 | 1.3394677682  | 0.0000000000 |
| H    | -8.0337813256 | 2.1797467082  | 0.0000000000 |
| S    | -5.6165167757 | 1.7367075099  | 0.0000000000 |
| C    | -5.1448238898 | 0.0529409365  | 0.0000000000 |
| S    | -6.4037770203 | -1.1552145644 | 0.0000000000 |
| C    | -3.8080192647 | -0.3032597070 | 0.0000000000 |
| S    | -2.5852762943 | 0.9436314783  | 0.0000000000 |
| S    | -3.3428180345 | -1.9852353222 | 0.0000000000 |
| C    | -1.5977635113 | -1.5839910279 | 0.0000000000 |
| H    | -0.9408046953 | -2.4445434968 | 0.0000000000 |
| C    | -1.2236794296 | -0.3075837802 | 0.0000000000 |
| C    | 0.1375285817  | 0.1999358671  | 0.0000000000 |
| C    | 0.5020871872  | 1.4886235014  | 0.0000000000 |
| S    | 1.4667421077  | -0.9819439780 | 0.0000000000 |
| H    | -0.2001332468 | 2.3134137026  | 0.0000000000 |
| S    | 2.1957743690  | 1.8998802640  | 0.0000000000 |
| C    | 2.7664150112  | 0.2206840649  | 0.0000000000 |
| C    | 4.0666813610  | -0.1056150506 | 0.0000000000 |
| S    | 5.3690155253  | 1.1059497423  | 0.0000000000 |
| S    | 4.6330445151  | -1.7929335385 | 0.0000000000 |
| C    | 6.6683081254  | -0.0954577544 | 0.0000000000 |
| C    | 6.3219245024  | -1.3900348752 | 0.0000000000 |
| H    | 7.0372836819  | -2.2029505870 | 0.0000000000 |
| C    | 8.0165011477  | 0.3587971647  | 0.0000000000 |
| N    | 9.1102767899  | 0.7367691906  | 0.0000000000 |

Table 7. Coordinates of TTF<sub>2</sub>F optimized at S<sub>0</sub>

| ATOM | X             | Y             | Z            |
|------|---------------|---------------|--------------|
| H    | -8.5785037546 | -0.4029041564 | 0.0000000000 |
| C    | -7.5652266379 | -0.0215414999 | 0.0000000000 |
| C    | -7.2418115906 | 1.2683335116  | 0.0000000000 |
| H    | -7.9550682909 | 2.0828264309  | 0.0000000000 |
| S    | -5.5386020203 | 1.6917391078  | 0.0000000000 |
| C    | -4.9638691024 | 0.0109769333  | 0.0000000000 |
| S    | -6.2645659755 | -1.1994842708 | 0.0000000000 |
| C    | -3.6629850259 | -0.3145752799 | 0.0000000000 |
| S    | -2.3689547478 | 0.8983321010  | 0.0000000000 |
| S    | -3.0838281524 | -1.9924962575 | 0.0000000000 |
| C    | -1.3920130027 | -1.5685680590 | 0.0000000000 |
| H    | -0.6882730954 | -2.3920684928 | 0.0000000000 |
| C    | -1.0390207980 | -0.2764651049 | 0.0000000000 |
| C    | 0.3255096236  | 0.2338979590  | 0.0000000000 |
| C    | 0.6772482543  | 1.5261808944  | 0.0000000000 |
| S    | 1.6572189621  | -0.9395124373 | 0.0000000000 |
| H    | -0.0266070784 | 2.3493906911  | 0.0000000000 |
| S    | 2.3693864619  | 1.9507176227  | 0.0000000000 |
| C    | 2.9486561411  | 0.2743461954  | 0.0000000000 |
| C    | 4.2494727628  | -0.0505697773 | 0.0000000000 |
| S    | 5.5382546934  | 1.1718384706  | 0.0000000000 |
| S    | 4.8201778431  | -1.7380518906 | 0.0000000000 |
| C    | 6.8242078113  | -0.0318411790 | 0.0000000000 |
| C    | 6.5266872841  | -1.3237633951 | 0.0000000000 |
| H    | 7.2613551159  | -2.1172130008 | 0.0000000000 |
| F    | 8.0550305122  | 0.4699329978  | 0.0000000000 |

Table 8. Coordinates of TTF<sub>2</sub>F optimized at S<sub>1</sub>

| ATOM | X             | Y             | Z            |
|------|---------------|---------------|--------------|
| H    | -8.5741102753 | -0.3823763385 | 0.0000000000 |
| C    | -7.5600133511 | -0.0032040229 | 0.0000000000 |
| C    | -7.2336886064 | 1.2859391646  | 0.0000000000 |
| H    | -7.9452622074 | 2.1019104909  | 0.0000000000 |
| S    | -5.5295915403 | 1.7057594147  | 0.0000000000 |
| C    | -4.9582745812 | 0.0238605674  | 0.0000000000 |
| S    | -6.2618195994 | -1.1839221292 | 0.0000000000 |
| C    | -3.6580616903 | -0.3039021657 | 0.0000000000 |
| S    | -2.3585281997 | 0.9029439086  | 0.0000000000 |
| S    | -3.0842144362 | -1.9846122461 | 0.0000000000 |
| C    | -1.3926596605 | -1.5689686206 | 0.0000000000 |
| H    | -0.6909876156 | -2.3944805660 | 0.0000000000 |
| C    | -1.0318044233 | -0.2786276763 | 0.0000000000 |
| C    | 0.3311792413  | 0.2270792911  | 0.0000000000 |
| C    | 0.7088490026  | 1.5080235713  | 0.0000000000 |
| S    | 1.6827321024  | -0.9842561998 | 0.0000000000 |
| H    | 0.0364541104  | 2.3569152113  | 0.0000000000 |
| S    | 2.4342294982  | 1.9195166675  | 0.0000000000 |
| C    | 2.916430052   | 0.2226507010  | 0.0000000000 |
| C    | 4.2538841029  | -0.1150622957 | 0.0000000000 |
| S    | 5.4724480371  | 1.1931094785  | 0.0000000000 |
| S    | 4.7866661704  | -1.7595368512 | 0.0000000000 |
| C    | 6.7827986589  | -0.0137883113 | 0.0000000000 |
| C    | 6.5238798414  | -1.3116043991 | 0.0000000000 |
| H    | 7.2457497279  | -2.1152408849 | 0.0000000000 |
| F    | 7.9902135837  | 0.5411477870  | 0.0000000000 |

Table 9. Coordinates of TTF<sub>2</sub>F optimized at S<sub>2</sub>

| ATOM | X             | Y             | Z            |
|------|---------------|---------------|--------------|
| H    | -8.5346869326 | -0.3801125706 | 0.0000000000 |
| C    | -7.5257295826 | 0.0111301212  | 0.0000000000 |
| C    | -7.1866289632 | 1.2952219779  | 0.0000000000 |
| H    | -7.8745851973 | 2.1306160643  | 0.0000000000 |
| S    | -5.4530141223 | 1.7068969768  | 0.0000000000 |
| C    | -4.9696355541 | 0.0257871731  | 0.0000000000 |
| S    | -6.2184336021 | -1.1937380079 | 0.0000000000 |
| C    | -3.6302799774 | -0.3198559761 | 0.0000000000 |
| S    | -2.4158749949 | 0.9349215538  | 0.0000000000 |
| S    | -3.1498881537 | -1.9971958375 | 0.0000000000 |
| C    | -1.4094979720 | -1.5814224152 | 0.0000000000 |
| H    | -0.7436424060 | -2.4350344427 | 0.0000000000 |
| C    | -1.0459526722 | -0.3013105953 | 0.0000000000 |
| C    | 0.3115269990  | 0.2170001784  | 0.0000000000 |
| C    | 0.6626029472  | 1.5096166869  | 0.0000000000 |
| S    | 1.6505690210  | -0.9532789937 | 0.0000000000 |
| H    | -0.0479957516 | 2.327178145   | 0.0000000000 |
| S    | 2.3514986348  | 1.9375347222  | 0.0000000000 |
| C    | 2.9388955941  | 0.2629530894  | 0.0000000000 |
| C    | 4.2413470009  | -0.0545023945 | 0.0000000000 |
| S    | 5.5253656855  | 1.174099531   | 0.0000000000 |
| S    | 4.8203080418  | -1.7395706117 | 0.0000000000 |
| C    | 6.8164755822  | -0.0238778907 | 0.0000000000 |
| C    | 6.5248974815  | -1.3171521406 | 0.0000000000 |
| H    | 7.2635119159  | -2.1069410304 | 0.0000000000 |
| F    | 8.0455163270  | 0.4831404745  | 0.0000000000 |
